# Supplementary material
Source: Elsevier journal article supplement (https://www.sciencedirect.com/science/article/pii/S0300893217301185)
Supplement: mmc1 [file S0300893217301185:mmc1.pdf]

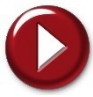

## Material suplementario

---

# Seguridad y eficacia clínica con prasugrel y ticagrelor en síndrome coronario agudo. Resultados de un registro multicéntrico en el mundo real

---

### ANEXO DEL MATERIAL SUPLEMENTARIO. INVESTIGADORES ARIAM-ANDALUCÍA

#### Hospital Universitario Virgen Macarena (Sevilla):

Manuel Almendro Delia, Emilia Blanco Ponce, Michel Butrón Calderón, Román Calvo Jambrina, Pedro Caravaca Pérez, Manuel Cassani Garza, Manuel García del Río, Néstor García González, Alberto García Guerrero, Juan Carlos García Rubira, Carlos Eduardo González Matos, Rafael Hidalgo Urbano, Manuel Lobo González, Beatriz Lorenzo López, Pablo Villar Calle, Luis Madrona Jiménez, María de los Ángeles Pérez Rodríguez, Pilar Ruiz García, Joffrey Eduardo Lujan Valencia y Álvaro Izquierdo Bajo.

#### Complejo Hospitalario Universitario de Málaga (Málaga):

Juan Horacio Alonso Briaes, Diana Elena Anca, Estefanía Cámara Sola, Ángel García Alcántara, Ana Guijarro Contreras, Agustín Hernández Bayo, Luis Ruíz del Fresno, Antonio Vallejo Baez, José María Castillo Caballero, M. Victoria de la Torre Prados, María Nieto González y Cristina Salazar Jiménez.

#### Complejo Hospitalario Universitario de Granada (Granada):

Eduardo Aguayo de Hoyos, Rafael de la Chica Ruiz Ruano, Remedios Díaz Contreras, Alberto Fernández Carmona, Daniela García Huertas, Francisco Manzano Manzano, Rafael Melgares Moreno, Manuel Fernando Passas Martínez, Antonio Reina Toral, Alba Ruiz Perea, Araceli Sánchez González e Irma Leonor Slimobich.

#### Hospital Regional Universitario de Málaga (Málaga):

José Andrés Arboleda Sánchez, Macarena Cano García, María José Chaparro Sánchez, Teresa García Paredes, Ana María Pouillet Brea. María Dolores Fernández Zamora y Emilio Curiel Balsera.

#### CORESOFTE (Málaga):

Diana Anca y Josele Benítez Parejo

**Figura 1 del material suplementario**

Mortalidad en subgrupos de riesgo isquémico y hemorrágico. Población total

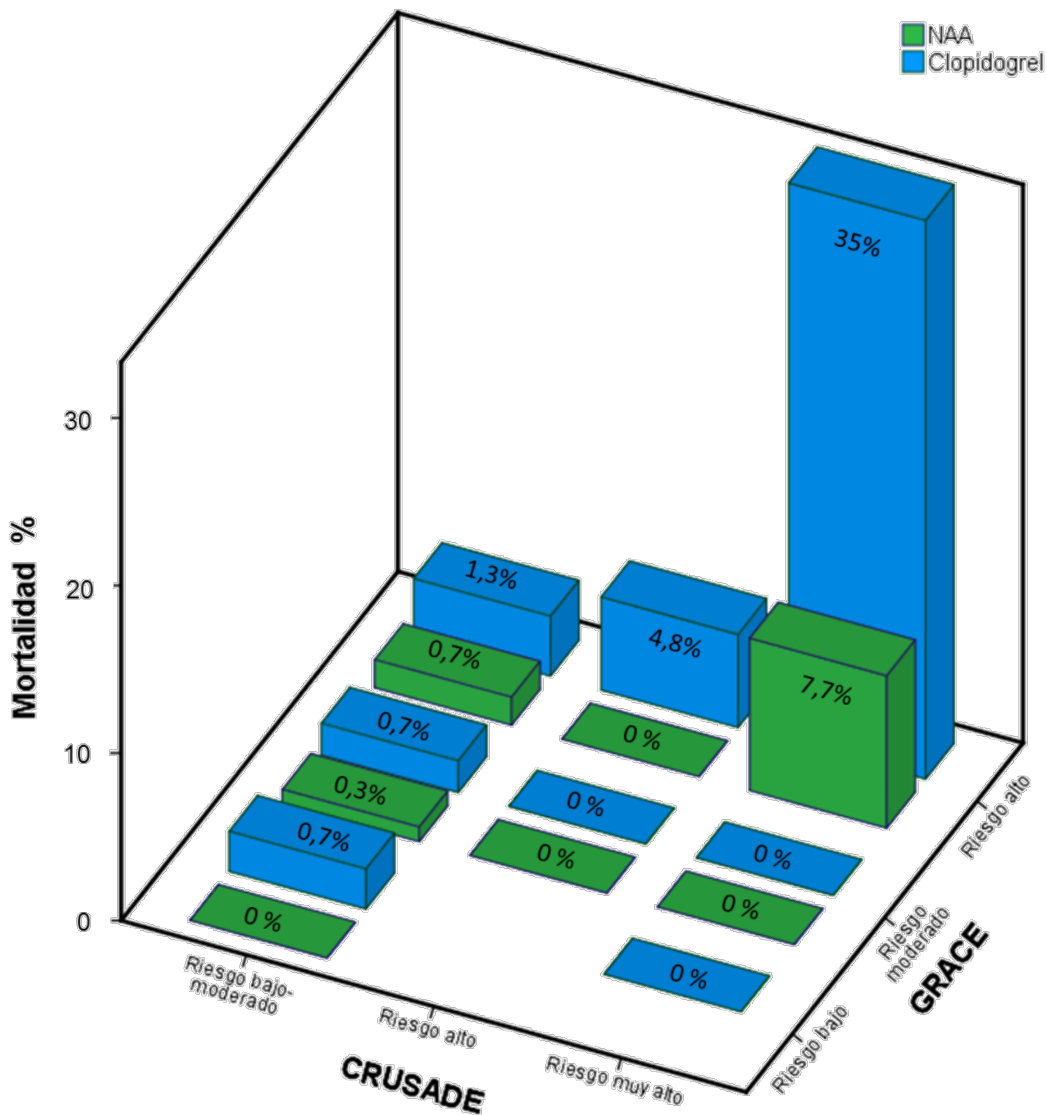


---

**Población total (n = 2.096)** **n**

---

**Riesgo isquémico GRACE**

- Bajo ( $\leq 108$ ) 552
  - Intermedio/moderado (109-140) 1.017
  - Alto ( $> 140$ ) 1.337
-

---

**Riesgo hemorrágico CRUSADE**

|                               |       |
|-------------------------------|-------|
| - Bajo-moderado ( $\leq 40$ ) | 2.412 |
| - Alto (41-50)                | 261   |
| - Muy alto ( $\geq 50$ )      | 233   |

---

NAA: nuevos angiagregantes.

**Figura 2 del material suplementario**

Mortalidad en subgrupos de riesgo isquémico y hemorrágico. Grupo emparejado

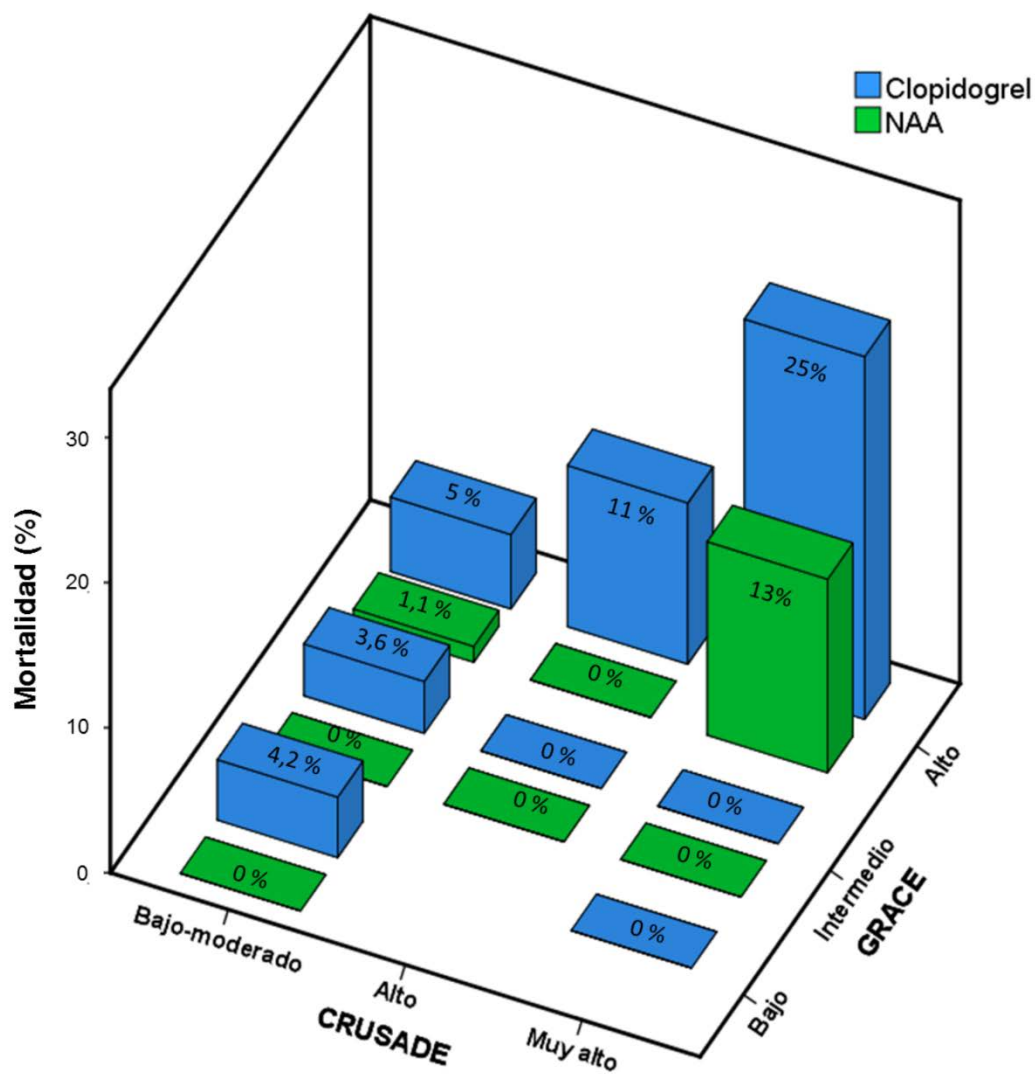

| Grupo emparejado (n = 1.792)    | n   |
|---------------------------------|-----|
| <b>Riesgo isquémico GRACE</b>   |     |
| - Bajo ( $\leq 108$ )           | 233 |
| - Intermedio/moderado (109-140) | 645 |
| - Alto ( $> 140$ )              | 914 |

---

**Riesgo hemorrágico CRUSADE**

|                               |       |
|-------------------------------|-------|
| - Bajo-moderado ( $\leq 40$ ) | 1.487 |
| - Alto (41-50)                | 179   |
| - Muy alto ( $\geq 50$ )      | 126   |

---

NAA: nuevos angiagregantes.
